# Supplementary material for: Endophytic Fungal and Bacterial Microbiota Shift in Rice and Barnyardgrass Grown under Co-Culture Condition
Source: MDPI journal article supplement (doi:10.3390/plants11121592), 2022-06-16
Supplement: s1 [file s1]

**Table S1.** Bacterial community composition at genus level in soil

| Genus                        | Soil 1   | Soil 2   | Soil 3   | Soil 4   | Soil 5   | Soil 6   |
|------------------------------|----------|----------|----------|----------|----------|----------|
| <i>Bacillus</i>              | 0.134176 | 0.116903 | 0.086166 | 0.156176 | 0.108563 | 0.097974 |
| SC-I-84(f)                   | 0.034790 | 0.04819  | 0.041810 | 0.044534 | 0.050242 | 0.043056 |
| <i>Nocardioide</i> s         | 0.022199 | 0.020587 | 0.020276 | 0.021427 | 0.069078 | 0.072689 |
| <i>MND1</i>                  | 0.032120 | 0.039929 | 0.039663 | 0.036208 | 0.027348 | 0.035585 |
| 67-14(f)                     | 0.030474 | 0.029439 | 0.031288 | 0.032923 | 0.032155 | 0.036429 |
| <i>Gaiella</i>               | 0.028517 | 0.026357 | 0.032546 | 0.027691 | 0.03247  | 0.032756 |
| TK10(c)                      | 0.038971 | 0.032061 | 0.032699 | 0.021618 | 0.007999 | 0.009835 |
| <i>Ellin6067</i>             | 0.020598 | 0.022882 | 0.028896 | 0.022993 | 0.016708 | 0.019629 |
| <i>Lapillicoccus</i>         | 0.006139 | 0.007212 | 0.005399 | 0.007142 | 0.063089 | 0.041072 |
| <i>Candidatus_Solibacter</i> | 0.015215 | 0.016981 | 0.021043 | 0.014743 | 0.015999 | 0.014141 |
| MB-A2-108(c)                 | 0.016550 | 0.017768 | 0.015951 | 0.016691 | 0.015486 | 0.017265 |
| <i>Pseudolabrys</i>          | 0.014726 | 0.018227 | 0.018926 | 0.018753 | 0.013556 | 0.013508 |
| <i>Fictibacillus</i>         | 0.016816 | 0.011474 | 0.008528 | 0.013368 | 0.021279 | 0.018236 |
| Gaiellales(o)                | 0.012857 | 0.012261 | 0.014632 | 0.012719 | 0.016275 | 0.016294 |
| <i>Sphingomonas</i>          | 0.013702 | 0.013310 | 0.014785 | 0.012910 | 0.011309 | 0.017096 |
| Pedospaeraceae(f)            | 0.012724 | 0.013572 | 0.012914 | 0.012680 | 0.012334 | 0.012073 |
| Methyloigellaceae(f)         | 0.009609 | 0.009245 | 0.010767 | 0.010618 | 0.013556 | 0.012157 |
| Gemmatimonadaceae(f)         | 0.012768 | 0.010490 | 0.011564 | 0.009510 | 0.009182 | 0.012748 |
| TRA3-20(f)                   | 0.010188 | 0.011998 | 0.013405 | 0.010121 | 0.007527 | 0.010595 |
| Xanthobacteraceae(f)         | 0.008097 | 0.010425 | 0.010982 | 0.010198 | 0.012058 | 0.011650 |
| <i>Ramlibacter</i>           | 0.011656 | 0.011474 | 0.010920 | 0.011611 | 0.006778 | 0.011524 |
| <i>Pseudomonas</i>           | 0.015393 | 0.012130 | 0.014018 | 0.010847 | 0.001458 | 0.002068 |
| <i>Anaeromyxobacter</i>      | 0.008586 | 0.009835 | 0.012423 | 0.010121 | 0.005596 | 0.007472 |
| <i>Nitrospira</i>            | 0.009698 | 0.009900 | 0.010675 | 0.008823 | 0.006857 | 0.007345 |
| <i>mle1-7</i>                | 0.007830 | 0.008130 | 0.010123 | 0.008326 | 0.007054 | 0.007260 |
| Geobacteraceae(f)            | 0.008408 | 0.009441 | 0.011503 | 0.008632 | 0.003074 | 0.006796 |
| S085(o)                      | 0.009787 | 0.011736 | 0.011472 | 0.006187 | 0.002837 | 0.004812 |
| <i>Terrabacter</i>           | 0.001913 | 0.002754 | 0.002577 | 0.002521 | 0.017417 | 0.013592 |
| <i>Pseudarthrobacter</i>     | 0.000712 | 0.000262 | 0.000552 | 0.000573 | 0.024983 | 0.006965 |
| <i>Arthrobacter</i>          | 0.000489 | 0.000852 | 0.000828 | 0.000649 | 0.016314 | 0.007260 |
| others                       | 0.434291 | 0.434173 | 0.442669 | 0.418685 | 0.351421 | 0.380118 |

**Table S2.** Fungal community composition at genus level in soil

| OTU ID                 | Soil 1   | Soil 2   | Soil 3   | Soil 4   | Soil 5   | Soil 6   |
|------------------------|----------|----------|----------|----------|----------|----------|
| <i>Coprinellus</i>     | 0.230134 | 0.114441 | 0.346799 | 0.134601 | 0.252542 | 0.456027 |
| Sordariales(o)         | 0.092263 | 0.125837 | 0.059661 | 0.049287 | 0.195820 | 0.155501 |
| <i>Emericellopsis</i>  | 0.026573 | 0.091599 | 0.033906 | 0.296464 | 0.035285 | 0.029920 |
| <i>Preussia</i>        | 0.220604 | 0.024477 | 0.097961 | 0.059073 | 0.037355 | 0.056850 |
| Sordariomycetes(c)     | 0.053733 | 0.048010 | 0.028770 | 0.094869 | 0.028744 | 0.033676 |
| <i>Penicillium</i>     | 0.029818 | 0.126629 | 0.036435 | 0.030993 | 0.028923 | 0.013542 |
| Fungi(k)               | 0.037968 | 0.077316 | 0.045455 | 0.025193 | 0.035643 | 0.018090 |
| <i>Apiosordaria</i>    | 0.057770 | 0.005979 | 0.026573 | 0.010297 | 0.033625 | 0.100746 |
| Branch03(o)            | 0.021079 | 0.141142 | 0.013593 | 0.019393 | 0.029792 | 0.009607 |
| <i>Aspergillus</i>     | 0.040600 | 0.029766 | 0.031836 | 0.052072 | 0.032245 | 0.023277 |
| <i>Talaromyces</i>     | 0.028821 | 0.017093 | 0.027901 | 0.032475 | 0.037176 | 0.010808 |
| <i>Chaetomium</i>      | 0.035107 | 0.015739 | 0.018141 | 0.032781 | 0.037406 | 0.010987 |
| <i>Zopfiella</i>       | 0.008406 | 0.014947 | 0.018805 | 0.008994 | 0.053605 | 0.010859 |
| <i>Thielavia</i>       | 0.005468 | 0.007716 | 0.028974 | 0.015688 | 0.006924 | 0.007614 |
| <i>Acrophialophora</i> | 0.008406 | 0.009709 | 0.015100 | 0.012060 | 0.008483 | 0.002708 |
| <i>Fusarium</i>        | 0.004855 | 0.004650 | 0.018652 | 0.010706 | 0.007512 | 0.004037 |
| <i>Neocosmospora</i>   | 0.010092 | 0.003475 | 0.010271 | 0.005570 | 0.009454 | 0.004625 |
| Alphamycetaceae(f)     | 0.004574 | 0.004395 | 0.029255 | 0.001226 | 0.001840 | 0.000945 |
| Rozellomycota(p)       | 0.004165 | 0.013440 | 0.008023 | 0.006285 | 0.006950 | 0.003347 |
| <i>Curvularia</i>      | 0.003756 | 0.004727 | 0.006260 | 0.006541 | 0.012418 | 0.002759 |
| <i>Scedosporium</i>    | 0.004344 | 0.013210 | 0.001814 | 0.002095 | 0.002759 | 0.001175 |
| <i>Acremonium</i>      | 0.000894 | 0.001022 | 0.000460 | 0.016403 | 0.002530 | 0.000818 |
| <i>Cercophora</i>      | 0.000792 | 0.000869 | 0.000537 | 0.001686 | 0.013542 | 2.56E-05 |
| others                 | 0.069702 | 0.071593 | 0.094818 | 0.075247 | 0.076039 | 0.042056 |

**Table S3.** Fungi showed pathogenicity in barnyardgrass at genus level

| Growth stages | genus                                                                                                                                                                                                                                                                                                                                                                                     |
|---------------|-------------------------------------------------------------------------------------------------------------------------------------------------------------------------------------------------------------------------------------------------------------------------------------------------------------------------------------------------------------------------------------------|
| BBCH 17       | <i>Curvularia</i> , <i>Acrophialophora</i> , <i>Gibellulopsis</i> , <i>Clonostachys</i> , <i>Ramichloridium</i> ,<br><i>Ramichloridium</i> , <i>Podosphaera</i> , <i>Hawksworthiomyces</i> , <i>Hortaea</i> , <i>Gibellulopsis</i> , <i>Lectera</i> ,<br><i>Curvularia</i>                                                                                                                |
| BBCH 24       | <i>Curvularia</i> , <i>Acrophialophora</i> , <i>Gibellulopsis</i> , <i>Clonostachys</i> , <i>Ramichloridium</i> ,<br><i>Ramichloridium</i> , <i>Podosphaera</i> , <i>Hawksworthiomyces</i> , <i>Hortaea</i> , <i>Gibellulopsis</i> , <i>Lectera</i> ,<br><i>Curvularia</i>                                                                                                                |
| BBCH 37       | <i>Curvularia</i> , <i>Gibellulopsis</i> , <i>Gibberella</i> , <i>Gibberella</i> , <i>Ramularia</i> , <i>Strelitziana</i> , <i>Exserohilum</i> ,<br><i>Peroneutypa</i> , <i>Phaeophleospora</i> , <i>Ramularia</i>                                                                                                                                                                        |
| BBCH 45       | <i>Peroneutypa</i> , <i>Volutella</i> , <i>Veronaea</i> , <i>Exserohilum</i> , <i>Gibberella</i> , <i>Stagonospora</i> ,<br><i>Moesziomyces</i> , <i>Cylindrocarpon</i>                                                                                                                                                                                                                   |
| BBCH 57       | <i>Curvularia</i> , <i>Acrophialophora</i> , <i>Gibellulopsis</i> , <i>Gibberella</i> , <i>Ramularia</i> , <i>Clonostachys</i> ,<br><i>Strelitziana</i> , <i>Pseudocercospora</i> , <i>Ramichloridium</i> , <i>Exserohilum</i> , <i>Stagonosporopsis</i> ,<br><i>Erysiphe</i> , <i>Pestalotiopsis</i> , <i>Stagonospora</i> , <i>Passalora</i> , <i>Phlyctochytrium</i> , <i>Dirkmeia</i> |

**Table S4.** The vital bacteria in rice groups

| Node_Name                                         | Degree Centrality | Closeness Centrality | Betweenness Centrality |
|---------------------------------------------------|-------------------|----------------------|------------------------|
| <i>Schlegelella</i>                               | 0.108696          | 0.386555             | 0.001612               |
| <i>Phenylobacterium</i>                           | 0.173913          | 0.429907             | 0.004738               |
| <i>Bradyrhizobium</i>                             | 0.173913          | 0.429907             | 0.004738               |
| <i>Haliangium</i>                                 | 0.173913          | 0.429907             | 0.005048               |
| Bacteroidales(o)                                  | 0.195652          | 0.438095             | 0.006291               |
| <i>Ideonella</i>                                  | 0.195652          | 0.438095             | 0.006291               |
| Rhizobiaceae(f)                                   | 0.043478          | 0.330935             | 0.008191               |
| <i>Rhodococcus</i>                                | 0.217391          | 0.446602             | 0.008332               |
| <i>Ralstonia</i>                                  | 0.217391          | 0.446602             | 0.008332               |
| Comamonadaceae(f)                                 | 0.217391          | 0.446602             | 0.008332               |
| <i>Sideroxydans</i>                               | 0.217391          | 0.446602             | 0.008332               |
| <i>Stenotrophomonas</i>                           | 0.217391          | 0.446602             | 0.008332               |
| Xanthomonadaceae(f)                               | 0.217391          | 0.446602             | 0.008332               |
| <i>Burkholderia-Caballeronia-Paraburkholderia</i> | 0.043478          | 0.321678             | 0.010030               |
| Pleomorphomonadaceae(f)                           | 0.217391          | 0.455446             | 0.016766               |
| Rhodocyclaceae(f)                                 | 0.217391          | 0.455446             | 0.016766               |
| Rhodocyclaceae(f)                                 | 0.217391          | 0.455446             | 0.016766               |
| <i>Delftia</i>                                    | 0.239130          | 0.464646             | 0.020241               |
| <i>Pseudomonas</i>                                | 0.239130          | 0.464646             | 0.020241               |
| <i>Gallionella</i>                                | 0.195652          | 0.429907             | 0.028086               |
| Gallionellaceae(f)                                | 0.239130          | 0.474227             | 0.047516               |
| <i>Chthonobacter</i>                              | 0.065217          | 0.422018             | 0.048066               |
| <i>possible_genus_04</i>                          | 0.195652          | 0.505495             | 0.218963               |

**Table S5.** The vital fungi in rice groups

| Node Name              | Degree Centrality | Closeness Centrality | Betweenness Centrality |
|------------------------|-------------------|----------------------|------------------------|
| Sordariales(o)         | 0.108696          | 0.389831             | 0.071670               |
| <i>Cladosporium</i>    | 0.152174          | 0.396552             | 0.042995               |
| <i>Acrophialophora</i> | 0.217391          | 0.418182             | 0.267963               |
| <i>Vishniacozyma</i>   | 0.282609          | 0.460000             | 0.028120               |
| Pleosporaceae(f)       | 0.347826          | 0.425926             | 0.017526               |
| <i>Tetracladium</i>    | 0.347826          | 0.425926             | 0.022430               |
| <i>Alternaria</i>      | 0.413043          | 0.522727             | 0.047928               |
| <i>Solicoccozyma</i>   | 0.413043          | 0.522727             | 0.047928               |
| <i>Tausonia</i>        | 0.413043          | 0.522727             | 0.047928               |
| <i>Fusarium</i>        | 0.434783          | 0.534884             | 0.056858               |
| Glomerellales(o)       | 0.434783          | 0.534884             | 0.147014               |
| <i>Filobasidium</i>    | 0.456522          | 0.547619             | 0.077631               |
| <i>Thermomyces</i>     | 0.478261          | 0.560976             | 0.121110               |

**Table S6.** The vital bacteria in barnyardgrass groups

| Node Name                                         | Degree Centrality | Closeness Centrality | Betweenness Centrality |
|---------------------------------------------------|-------------------|----------------------|------------------------|
| <i>Geobacter</i>                                  | 0.032258          | 0.302439             | 0.000121               |
| Rhizobiales_Incertae_Sedis(f)                     | 0.032258          | 0.291080             | 0.000193               |
| <i>Treponema</i>                                  | 0.032258          | 0.314721             | 0.000737               |
| <i>Dechloromonas</i>                              | 0.080645          | 0.311558             | 0.001082               |
| Micromonosporaceae(f)                             | 0.064516          | 0.321244             | 0.001455               |
| Hungateiclostridiaceae(f)                         | 0.080645          | 0.324607             | 0.001724               |
| <i>Pseudactinotalea</i>                           | 0.096774          | 0.328042             | 0.003042               |
| <i>Ralstonia</i>                                  | 0.064516          | 0.314721             | 0.003141               |
| <i>Clostridium_sensu_stricto_1</i>                | 0.129032          | 0.335135             | 0.006212               |
| Fibrobacteraceae(f)                               | 0.032258          | 0.358382             | 0.006872               |
| Paludibacteraceae(f)                              | 0.048387          | 0.400000             | 0.013035               |
| <i>Massilia</i>                                   | 0.145161          | 0.380368             | 0.018088               |
| Methylophilaceae(f)                               | 0.177419          | 0.366864             | 0.020010               |
| <i>Streptomyces</i>                               | 0.048387          | 0.405229             | 0.023338               |
| <i>Gallionella</i>                                | 0.096774          | 0.416107             | 0.032187               |
| <i>Sideroxydans</i>                               | 0.096774          | 0.416107             | 0.032187               |
| Gallionellaceae(f)                                | 0.096774          | 0.416107             | 0.032187               |
| Rhodocyclaceae(f)                                 | 0.048387          | 0.394904             | 0.044992               |
| <i>Burkholderia-Caballeronia-Paraburkholderia</i> | 0.225806          | 0.405229             | 0.047708               |
| <i>Rhodococcus</i>                                | 0.306452          | 0.433566             | 0.089451               |
| <i>Bacillus</i>                                   | 0.306452          | 0.433566             | 0.089451               |
| <i>Methylocystis</i>                              | 0.177419          | 0.459259             | 0.116417               |
| <i>Pseudomonas</i>                                | 0.161290          | 0.452555             | 0.150900               |

**Table S7.** The vital fungi in barnyardgrass groups

| Node Name                | Degree Centrality | Closeness Centrality | Betweenness Centrality |
|--------------------------|-------------------|----------------------|------------------------|
| <i>Scolecobasidium</i>   | 0.048387          | 0.378049             | 0.001084               |
| <i>Exserohilum</i>       | 0.032258          | 0.316327             | 0.002862               |
| <i>Phaeosphaeriopsis</i> | 0.080645          | 0.387500             | 0.004240               |
| Helotiales(o)            | 0.080645          | 0.387500             | 0.005239               |
| <i>Ascobolus</i>         | 0.064516          | 0.397436             | 0.006515               |
| Tremellaceae(f)          | 0.080645          | 0.387500             | 0.006737               |
| <i>Thielavia</i>         | 0.064516          | 0.397436             | 0.014272               |
| <i>Albifimbria</i>       | 0.112903          | 0.413333             | 0.016282               |
| <i>Aspergillus</i>       | 0.145161          | 0.407895             | 0.019798               |
| Fungi(k)                 | 0.145161          | 0.407895             | 0.019798               |
| Didymellaceae(f)         | 0.096774          | 0.392405             | 0.026070               |
| Ascomycota(p)            | 0.161290          | 0.413333             | 0.029296               |
| Glomerellales(o)         | 0.161290          | 0.430556             | 0.033501               |
| Chytridiomycota(p)       | 0.161290          | 0.430556             | 0.033501               |
| <i>Penicillium</i>       | 0.161290          | 0.413333             | 0.034316               |
| <i>Phoma</i>             | 0.161290          | 0.413333             | 0.037049               |
| <i>Epicoccum</i>         | 0.161290          | 0.430556             | 0.038152               |
| <i>Acremonium</i>        | 0.177419          | 0.418919             | 0.043604               |
| <i>Pseudopithomyces</i>  | 0.129032          | 0.402597             | 0.063354               |
| <i>Apodus</i>            | 0.193548          | 0.424658             | 0.068320               |
| <i>Acrophialophora</i>   | 0.403226          | 0.543860             | 0.509230               |
